# Supplementary material for: High-resolution topography of the Antarctic Peninsula combiningTanDEM-X DEM and REMA mosaic
Source: Copernicus journal article supplement (doi:10.5194/tc-2020-323), 2020-12-04
Supplement: Supplementary file 1 [file tc-2020-323-supplement.pdf]

## Supplementary materials

**Table S1.** Literature review of the existing DEM products covering Antarctica or Antarctic Peninsula

| DEM product                                                                                                           | Coverage                                       | Data source                                                | Temporal coverage                                                                 | Posting               | Absolute vertical accuracy                                                                                                              |
|-----------------------------------------------------------------------------------------------------------------------|------------------------------------------------|------------------------------------------------------------|-----------------------------------------------------------------------------------|-----------------------|-----------------------------------------------------------------------------------------------------------------------------------------|
| <b>RAMPv2 DEM</b><br>(Liu et al., 2001)                                                                               | Antarctica<br>60 °S–90 °S                      | cartographic data;<br>remotely sensed data;<br>survey data | 1 January 1940 to 1 January 1999                                                  | 1 km, 400 m,<br>200 m | Rugged mountainous areas: 100 m;<br>Steeply sloped coastal regions: 15 m;<br>Ice shelves: 1 m; Gently sloping interior ice sheet: 7.5 m |
| <b>GLAS/ICESat 500 m Laser Altimetry DEM of Antarctica</b><br>(DiMarzio et al., 2007)                                 | Antarctica<br>63 °S–86 °S                      | GLAS/ICESat laser altimetry profile data                   | 1 February 2003 to 30 June 2005                                                   | 500 m                 | Ranging from less than 1m to tens of meters                                                                                             |
| <b>New 1km DEM of Antarctica from combined radar and laser data</b><br>(Bamber et al., 2009; Griggs and Bamber, 2009) | Antarctica<br>North of 90 °S                   | ERS-1 radar and GLAS/ICESat laser altimetry data           | ERS-1 RA data: 1991 to May 1995;<br>GLAS/ICESat data: February 2003 to March 2008 | 1 km                  | Ice shelves: 1 m;<br>Grounded ice sheet: 2 m – 6m;<br>Steep sloping margins: greater than 20 m.                                         |
| <b>SPOT 5 Reference Images and Topographies (SPIRIT) DTM</b><br>(Korona et al., 2009)                                 | Selected polar regions at<br>81.15 °N–81.15 °S | SPOT 5 stereoscopic images                                 | July 2007 to April 2008                                                           | 40 m                  | 6 m                                                                                                                                     |
| <b>ASTER GDEM</b><br>(ASTER GDEM Validation Team, 2009, 2011; Abrams et al., 2020)                                    | Global DEM<br>83 °N–83 °S                      | visible and near-infrared satellite data                   | March 2000 to November 2007                                                       | 30 m                  | 10 m                                                                                                                                    |

|                                                                      |                                      |                                                                                                             |                                                                                                                                       |                    |                                                                                                               |
|----------------------------------------------------------------------|--------------------------------------|-------------------------------------------------------------------------------------------------------------|---------------------------------------------------------------------------------------------------------------------------------------|--------------------|---------------------------------------------------------------------------------------------------------------|
| <b>Improved ASTER GDEM</b><br>(Cook et al., 2012)                    | Antarctic Peninsula<br>(63 °S–70 °S) | ASTER GDEM                                                                                                  | March 2000 to November 2007                                                                                                           | 100 m              | 4 m                                                                                                           |
| <b>Bedmap2, surface DEM</b><br>(Fretwell et al., 2013)               | Antarctica<br>60 °S–90 °S            | ASTER GDEM,<br>SPIRIT DTM, satellite<br>radar and laser<br>altimetry data, the Ohio<br>State University DEM | The vast majority of data were<br>collected in the last two decades                                                                   | 1 km               | 30 m (rising to 130 m over<br>mountains)                                                                      |
| <b>CryoSat-2 Antarctic DEM<br/>2012</b><br>(Helm et al., 2014)       | Antarctica<br>North of 90 °S         | CryoSat-2 satellite<br>radar altimetry data                                                                 | January 2012 to January 2013                                                                                                          | 1 km               | 90 % of the area of ice sheets: 3m ±<br>15m.                                                                  |
| <b>CryoSat-2 Antarctic DEM<br/>2017</b><br>(Fei et al., 2017)        | Antarctica<br>North of 90 °S         | CryoSat-2 satellite<br>radar altimetry data                                                                 | December 2012 to January 2015                                                                                                         | 1 km               | Domes: 1 m; Ice shelves: 4 m;<br>Interior ice sheet: 10 m; Rugged<br>mountainous and coastal areas: 150<br>m. |
| <b>CryoSat-2 Antarctic DEM<br/>2018</b><br>(Slater et al., 2018)     | Antarctica<br>North of 88 °S         | CryoSat-2 satellite<br>radar altimetry data                                                                 | July 2010 to July 2016                                                                                                                | 1 km               | 9.5 m                                                                                                         |
| <b>TanDEM-X global DEM</b><br>(Wessel, 2016;Rizzoli et al.,<br>2017) | Global DEM<br>85 °N–90 °S            | TanDEM-X bistatic<br>stripmap InSAR data                                                                    | December 2010 to January 2015 (for<br>global acquisitions);<br>April to November of 2013 and 2014<br>(for acquisitions at Antarctica) | 12, 30 and 90<br>m | 10 m                                                                                                          |
| <b>REMA DEM</b><br>(Howat et al., 2019)                              | Antarctica<br>North of 88 °S         | submeter resolution<br>optical, commercial<br>satellite imagery                                             | September 2008 to August 2014                                                                                                         | Less than 10<br>m  | less than 1 m                                                                                                 |

**Table S2.** Statistics of DEM height differences between the laser points and the TDM DEMs after each iteration of correction over the local sample area in Fig. 11. All height units are in meters. Height differences calculated as DEM elevation minus laser height.

|               |                         | Elevation<br>range | Num. of<br>points | Mean | RMSE | 90 % quantile |
|---------------|-------------------------|--------------------|-------------------|------|------|---------------|
| LVIS<br>2015  | After 1st<br>correction | 1000–1500          | 20                | 4.1  | 9.5  | 10.0          |
|               |                         | 1500–2000          | 43496             | 0.8  | 9.5  | 10.0          |
|               | After 2nd<br>correction | 1000–1500          | 20                | 6.0  | 3.3  | 10.0          |
|               |                         | 1500–2000          | 43496             | 1.6  | 6.3  | 9.0           |
|               | After 3rd<br>correction | 1000–1500          | 20                | 6.0  | 3.3  | 10.0          |
|               |                         | 1500–2000          | 43535             | 1.6  | 4.7  | 8.0           |
| ATL06<br>2019 | After 1st<br>correction | 1000–1500          | 50                | -5.6 | 28.4 | 3.0           |
|               |                         | 1500–2000          | 1606              | -6.8 | 17.7 | 5.0           |
|               | After 2nd<br>correction | 1000–1500          | 49                | -1.6 | 3.7  | 3.0           |
|               |                         | 1500–2000          | 1607              | -2.3 | 6.7  | 5.0           |
|               | After 3rd<br>correction | 1000–1500          | 49                | -1.5 | 3.5  | 3.0           |
|               |                         | 1500–2000          | 1607              | -1.3 | 4.6  | 5.0           |

**Table S3.** Statistics of DEM height differences between the laser altimetry points and the corrected TDM DEMs after each iteration of correction over the Hektoría and Green Glaciers area in Fig. 12. All height units are in meters. Height differences calculated as DEM elevation minus laser height.

|               |                         | Elevation range | Num. of points | Mean | RMSE  | 90 % quantile |
|---------------|-------------------------|-----------------|----------------|------|-------|---------------|
| LVIS<br>2015  | After 1st<br>correction | >=500           | 3411178        | 9.1  | 21.0  | 32.8          |
|               |                         | 15–500          | 1414822        | 13.3 | 15.2  | 34.3          |
|               |                         | 500–1000        | 993509         | 12.9 | 21.4  | 38.5          |
|               |                         | 1000–1500       | 278735         | 6.8  | 33.2  | 36.0          |
|               |                         | 1500–2000       | 642262         | -3.8 | 20.0  | 11.0          |
|               |                         | >=2000          | 81850          | 0.9  | 7.8   | 6.0           |
|               | After 2nd<br>correction | >=500           | 3412383        | 5.8  | 11.4  | 16.5          |
|               |                         | 15–500          | 1435731        | 8.1  | 8.5   | 17.0          |
|               |                         | 500–1000        | 977007         | 5.9  | 12.3  | 17.0          |
|               |                         | 1000–1500       | 272967         | 5.5  | 18.3  | 20.0          |
|               |                         | 1500–2000       | 641855         | 1.2  | 10.6  | 11.0          |
|               |                         | >=2000          | 84823          | 1.1  | 6.0   | 6.0           |
|               | After 3rd<br>correction | >=500           | 3412552        | 5.0  | 10.5  | 14.5          |
|               |                         | 15–500          | 1439149        | 7.2  | 8.0   | 16.0          |
|               |                         | 500–1000        | 974766         | 4.4  | 11.4  | 13.5          |
|               |                         | 1000–1500       | 272005         | 4.7  | 17.4  | 18.0          |
|               |                         | 1500–2000       | 641497         | 1.5  | 9.5   | 10.0          |
|               |                         | >=2000          | 85135          | 1.4  | 5.0   | 6.0           |
| ATL06<br>2019 | After 1st<br>correction | >=500           | 20464          | 12.4 | 20.9  | 37.0          |
|               |                         | 15–500          | 7987           | 22.7 | 22.1  | 49.0          |
|               |                         | 500–1000        | 6912           | 12.9 | 14.1  | 29.5          |
|               |                         | 1000–1500       | 887            | 2.5  | 18.9  | 12.0          |
|               |                         | 1500–2000       | 4351           | -4.4 | 16.2  | 5.0           |
|               |                         | >=2000          | 327            | 1.0  | 4.9   | 4.4           |
|               | After 2nd<br>correction | >=500           | 20490          | 9.2  | 13.4  | 26.5          |
|               |                         | 15–500          | 8045           | 15.6 | 14.8  | 34.3          |
|               |                         | 500–1000        | 6874           | 9.5  | 10.1  | 18.5          |
|               |                         | 1000–1500       | 878            | 3.2  | 10.2  | 11.0          |
|               |                         | 1500–2000       | 4366           | -1.3 | 7.7   | 5.0           |
|               |                         | >=2000          | 327            | 1.3  | 3.2   | 4.4           |
|               | After 3rd<br>correction | >=500           | 20507          | 8.7  | 12.87 | 25.8          |
|               |                         | 15–500          | 8081           | 14.7 | 14.5  | 34.0          |
|               |                         | 500–1000        | 6856           | 8.7  | 10.2  | 18.0          |
|               |                         | 1000–1500       | 872            | 3.5  | 7.6   | 10.9          |
|               |                         | 1500–2000       | 4372           | -0.9 | 6.6   | 5.0           |
|               |                         | >=2000          | 326            | 1.2  | 3.2   | 4.0           |

## References

- Abrams, M., Crippen, R., and Fujisada, H.: ASTER Global Digital Elevation Model (GDEM) and ASTER Global Water Body Dataset (ASTWBD), *Remote Sens.*, 12, 1156, 2020.
- ASTER GDEM Validation Team: ASTER Global Digital Elevation Model Version 2 – Summary of Validation Results, NASA Land Processes Distributed Active Archive Center and Joint Japan-US ASTER Science Team, available at: [http://www.jspacesystems.or.jp/ersdac/GDEM/ver2Validation/Summary GDEM2 validation report final.pdf](http://www.jspacesystems.or.jp/ersdac/GDEM/ver2Validation/Summary%20validation%20report%20final.pdf), 2011, 2009.
- ASTER GDEM Validation Team: METI/ERSDAC, NASA/LPDAAC, USGS/EROS, in cooperation with NGA and other collaborators, ASTER GDEM Validation Summary Report, available at: [http://www.jspacesystems.or.jp/ersdac/GDEM/E/image/ASTERGDEM ValidationSummaryReport Ver1.pdf](http://www.jspacesystems.or.jp/ersdac/GDEM/E/image/ASTERGDEM%20ValidationSummaryReport%20Ver1.pdf), 2009, 2011.
- Bamber, J., Gomez-Dans, J., and Griggs, J.: A new 1 km digital elevation model of the Antarctic derived from combined satellite radar and laser data–Part 1: Data and methods, *The Cryosphere*, 3, 101-111, 2009.
- Cook, A. J., Murray, T., Luckman, A., Vaughan, D. G., and Barrand, N. E.: A new 100-m Digital Elevation Model of the Antarctic Peninsula derived from ASTER Global DEM: methods and accuracy assessment, *Earth system science data.*, 4, 129-142, 2012.
- DiMarzio, J., Brenner, A., Schutz, R., Shuman, C., and Zwally, H.: GLAS/ICESat 500 m laser altimetry digital elevation model of Antarctica, National Snow and Ice Data Center, 2007.
- Fei, L., Feng, X., Sheng - Kai, Z., Dong - Chen, E., Xiao, C., Wei - Feng, H., Le - Xian, Y., and Yao - Wen, Z.: DEM DEVELOPMENT AND PRECISION ANALYSIS FOR ANTARCTIC ICE SHEET USING CRYOSAT - 2 ALTIMETRY DATA, *Chinese Journal of Geophysics*, 60, 231-243, 2017.
- Fretwell, P., Pritchard, H. D., Vaughan, D. G., Bamber, J. L., Barrand, N., Bell, R., Bianchi, C., Bingham, R., Blankenship, D. D., and Casassa, G.: Bedmap2: improved ice bed, surface and thickness datasets for Antarctica, *The Cryosphere*, 7, 375-393, 2013.
- Griggs, J., and Bamber, J.: A new 1 km digital elevation model of Antarctica derived from combined radar and laser data-Part 2: Validation and error estimates, *The Cryosphere*, 3, 113, 2009.
- Helm, V., Humbert, A., and Miller, H.: Elevation and elevation change of Greenland and Antarctica derived from CryoSat-2, *The Cryosphere*, 8, 1539-1559, 2014.

- Howat, I. M., Porter, C., Smith, B. E., Noh, M.-J., and Morin, P.: The reference elevation model of Antarctica, *The Cryosphere*, 13, 665-674, 2019.
- Korona, J., Berthier, E., Bernard, M., R ény, F., and Thouvenot, E.: SPIRIT. SPOT 5 stereoscopic survey of polar ice: reference images and topographies during the fourth International Polar Year (2007–2009), *ISPRS J. Photogramm. Remote Sens.*, 64, 204-212, 2009.
- Liu, H., Jezek, K., Li, B., and Zhao, Z.: Radarsat Antarctic Mapping Project digital elevation model version 2, Digital media, National Snow and Ice Data Center, Boulder, CO, USA, 2001.
- Rizzoli, P., Martone, M., Gonzalez, C., Wecklich, C., Tridon, D. B., Br äutigam, B., Bachmann, M., Schulze, D., Fritz, T., and Huber, M.: Generation and performance assessment of the global TanDEM-X digital elevation model, *ISPRS J. Photogramm. Remote Sens.*, 132, 119-139, 2017.
- Slater, T., Shepherd, A., McMillan, M., Muir, A., Gilbert, L., Hogg, A. E., Konrad, H., and Parrinello, T.: A new digital elevation model of Antarctica derived from CryoSat-2 altimetry, *The Cryosphere*, 12, 1551-1562, 2018.
